# Supplementary material
Source: PubMed Central journal article supplement (PMC9647571)
Supplement: PEDS_2021055226SupplementaryData.pdf [file PEDS_2021055226SupplementaryData.pdf]

## SUPPLEMENTAL INFORMATION

**SUPPLEMENTAL TABLE 3** Mental Health Diagnoses Before Overdoses Involving BZD

| Overdoses Involving BZDs                         | <i>N</i> = 2986 | Intent of Overdoses Involving BZDs |                                  |
|--------------------------------------------------|-----------------|------------------------------------|----------------------------------|
|                                                  |                 | Intentional ( <i>N</i> = 1664)     | Unintentional ( <i>N</i> = 1160) |
| Mental health diagnoses, any, <i>n</i> (%)       | 2232 (74.7)     | 1300 (78.1)                        | 813 (70.1)                       |
| ADHD                                             | 486 (16.3)      | 278 (16.7)                         | 181 (15.6)                       |
| Depression                                       | 1359 (45.5)     | 875 (52.6)                         | 416 (35.9)                       |
| Anxiety disorder                                 | 1435 (48.1)     | 880 (52.9)                         | 488 (42.1)                       |
| Substance use disorder                           | 816 (27.3)      | 363 (21.8)                         | 397 (34.2)                       |
| Other mental health diagnosis                    | 151 (5.1)       | 75 (4.5)                           | 66 (5.7)                         |
| Subset with BZD prescription(s) in previous 6 mo | <i>N</i> = 1243 | <i>N</i> = 850                     | <i>N</i> = 348                   |
| Mental health diagnosis, any, <i>n</i> (%)       | 1153 (92.8)     | 785 (92.4)                         | 324 (93.1)                       |
| ADHD                                             | 242 (19.5)      | 153 (18.0)                         | 78 (22.4)                        |
| Depression                                       | 763 (61.4)      | 545 (64.1)                         | 190 (54.6)                       |
| Anxiety disorder                                 | 908 (73.0)      | 612 (72.0)                         | 260 (74.7)                       |
| Substance use disorder                           | 335 (27.0)      | 183 (21.5)                         | 134 (38.5)                       |
| Other mental health diagnosis                    | 55 (4.4)        | 35 (4.1)                           | 18 (5.2)                         |

Any mental health diagnosis in 6 mo before overdose (ICD-9-CM: 290–319; ICD-10-CM: F01–F99); ADHD (ICD-9-CM: 314; ICD-10-CM: F90); depression (ICD-9-CM: 296.2; 296.3; 300.4; 311; ICD-10-CM: F32; F33; F34.1); anxiety disorder (ICD-9-CM: 300.0; 300.2; 309.21; ICD-10-CM: F40; F41; F93.0); substance use disorder (excludes tobacco use disorder, ICD-9-CM: 291, 292, 303, 304, 305.0, 305.2–305.9; ICD-10-CM: F10–F16, F18F–F19, F55). ADHD, attention-deficit/hyperactivity disorder.

**SUPPLEMENTAL TABLE 4** Mental Health Diagnoses Before Overdoses Involving Stimulants

| Overdoses Involving Stimulants (Amphetamine or Methylphenidate) | <i>N</i> = 971 | Intent of Overdoses Involving Stimulants |                                 |
|-----------------------------------------------------------------|----------------|------------------------------------------|---------------------------------|
|                                                                 |                | Intentional ( <i>N</i> = 388)            | Unintentional ( <i>N</i> = 524) |
| Mental health diagnosis, any, <i>n</i> (%)                      | 634 (65.3)     | 299 (77.1)                               | 299 (57.1)                      |
| ADHD                                                            | 314 (32.3)     | 178 (45.9)                               | 125 (23.9)                      |
| Depression                                                      | 309 (31.8)     | 178 (45.9)                               | 113 (21.6)                      |
| Anxiety disorder                                                | 289 (29.8)     | 136 (35.1)                               | 140 (26.7)                      |
| Substance use disorder                                          | 223 (23.0)     | 74 (19.1)                                | 135 (25.8)                      |
| Other mental health diagnosis                                   | 44 (4.5)       | 18 (4.6)                                 | 21 (4.0)                        |
| Subset with stimulant prescription(s) in previous 6 mo          | <i>N</i> = 380 | <i>N</i> = 219                           | <i>N</i> = 147                  |
| Mental health diagnosis, any, <i>n</i> (%)                      | 335 (88.2)     | 199 (90.9)                               | 123 (83.7)                      |
| ADHD                                                            | 271 (71.3)     | 159 (72.6)                               | 104 (70.7)                      |
| Depression                                                      | 157 (41.3)     | 113 (51.6)                               | 38 (25.9)                       |
| Anxiety disorder                                                | 145 (38.2)     | 91 (41.6)                                | 50 (34.0)                       |
| Substance use disorder                                          | 62 (16.3)      | 35 (16.0)                                | 26 (17.7)                       |
| Other mental health diagnosis                                   | 13 (3.4)       | 7 (3.2)                                  | 4 (2.7)                         |

Any mental health diagnosis in 6 mo before overdose (ICD-9-CM: 290–319; ICD-10-CM: F01–F99); ADHD (ICD-9-CM: 314; ICD-10-CM: F90); depression (ICD-9-CM: 296.2; 296.3; 300.4; 311; ICD-10-CM: F32; F33; F34.1); anxiety disorder (ICD-9-CM: 300.0; 300.2; 309.21; ICD-10-CM: F40; F41; F93.0); substance use disorder (excludes tobacco use disorder, ICD-9-CM: 291, 292, 303, 304, 305.0, 305.2–305.9; ICD-10-CM: F10–F16, F18F–F19, F55). ADHD, attention-deficit/hyperactivity disorder.
